# Supplementary material for: PIM3-mediated phosphorylation stabilizes myeloid leukemia factor 2 to promote metastasis in osteosarcoma
Source: JCI journal article supplement (doi:10.1172/jci191040), 2025-10-14

Full unedited blot for Figure1

Figure 1C

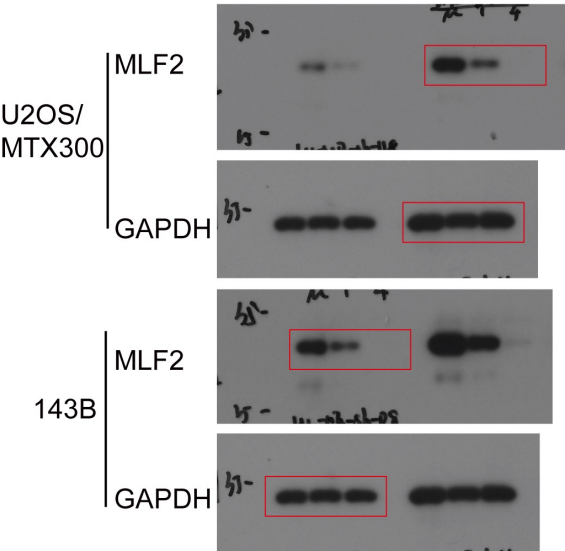

Figure 1D

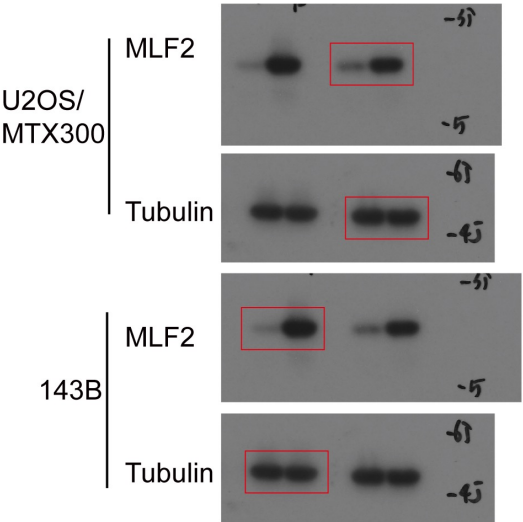

Full unedited blot for Figure2

Figure 2A

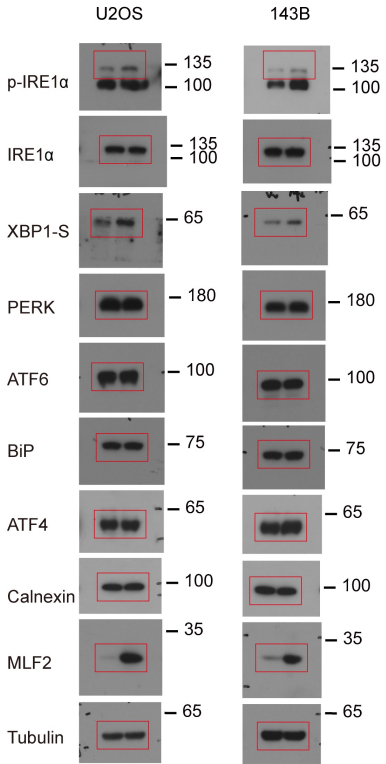

Figure 2B

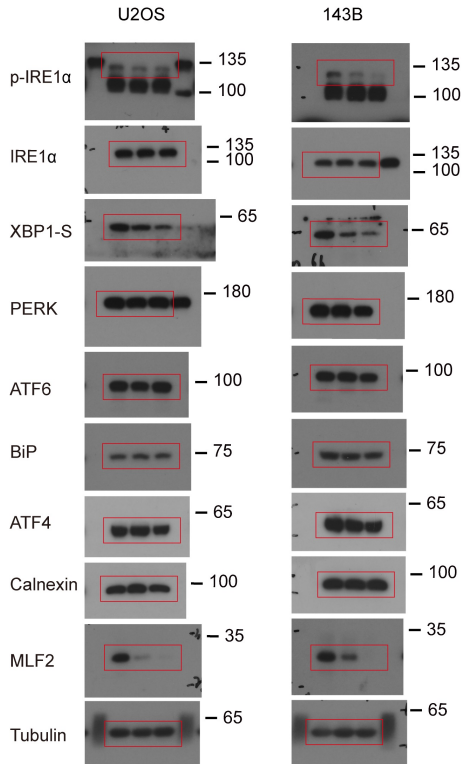

Figure 2C

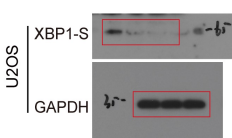

Figure 2D

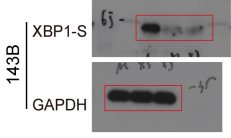

Figure 2F

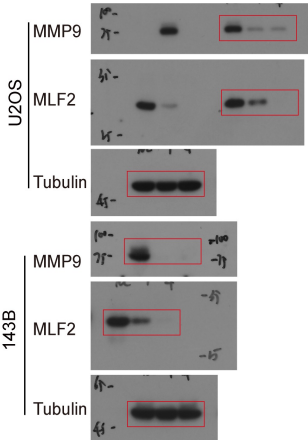

Figure 2G

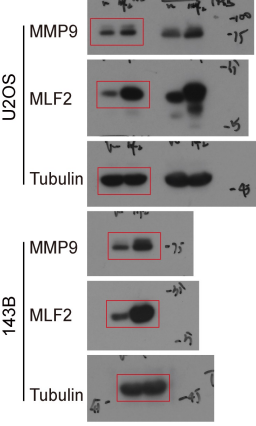

Figure 2H

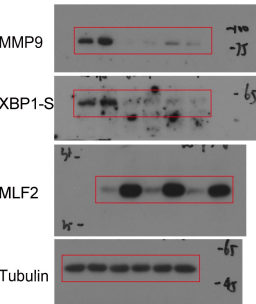

Figure 2I

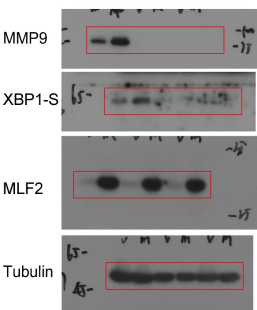

Figure 2J

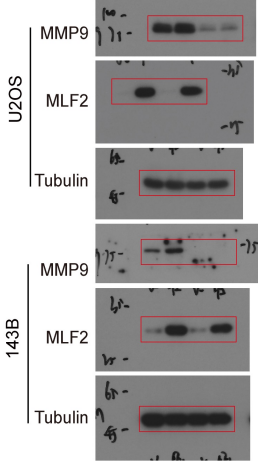

Full unedited blot for Figure3

Figure 3A

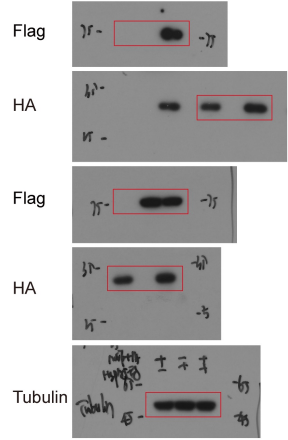

Figure 3D

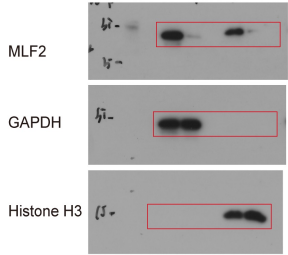

Figure 3H

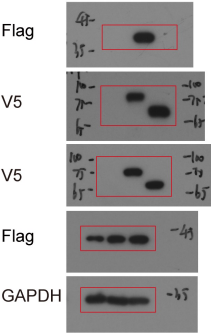

Figure 3B

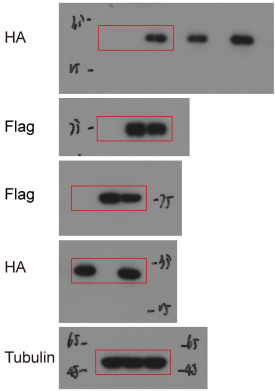

Figure 3E

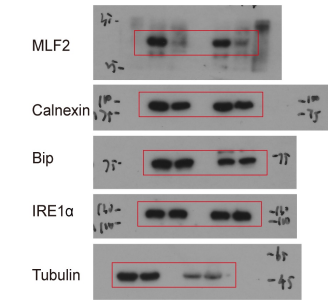

Figure 3I

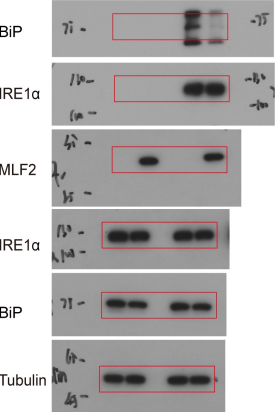

Figure 3C

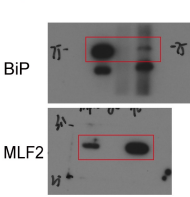

Figure 3G

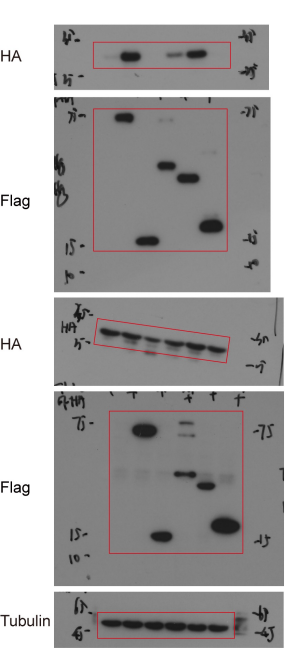

Figure 3J

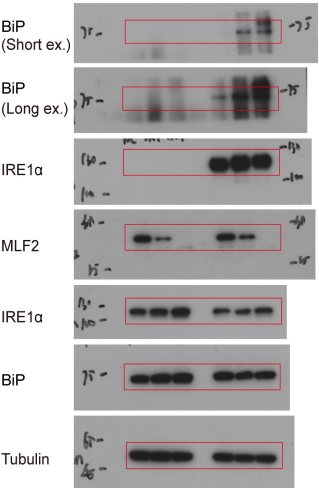

Full unedited blot for Figure4

Figure 4A

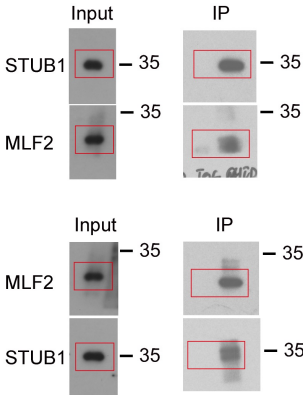

Figure 4E

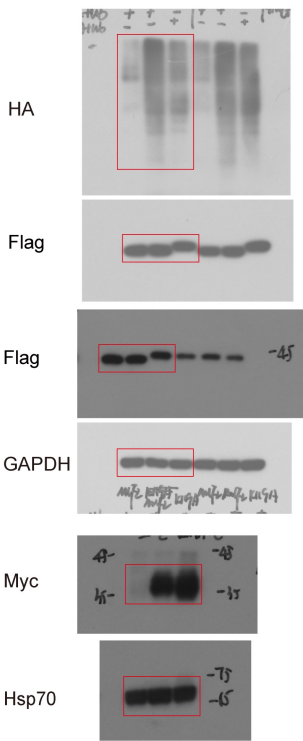

Figure 4B

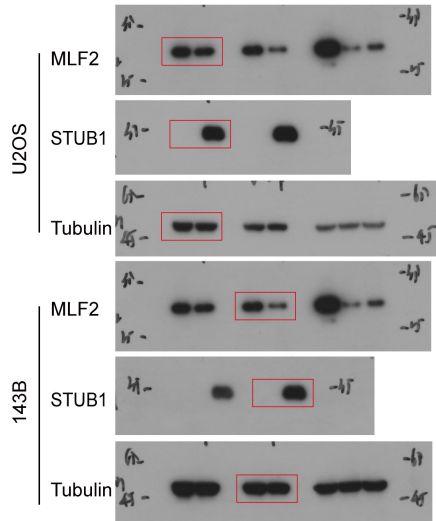

Figure 4F

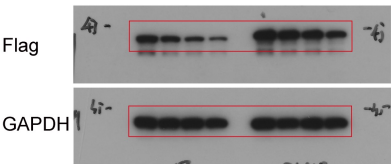

Figure 4C

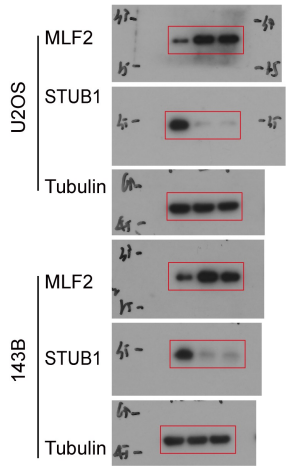

Figure 4D

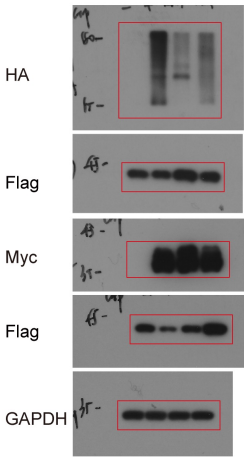

Figure 4H

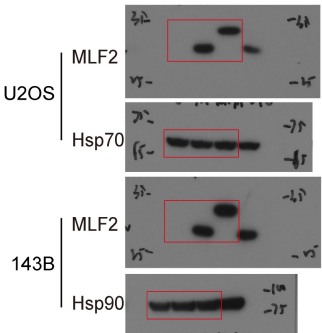



Full unedited blot for Figure5

Figure 5C

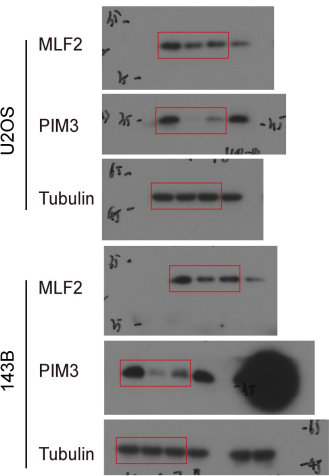

Figure 5E

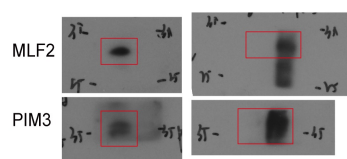

Figure 5G

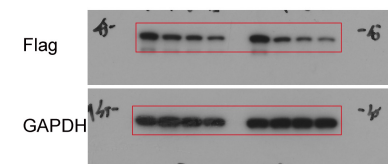

Figure 5F

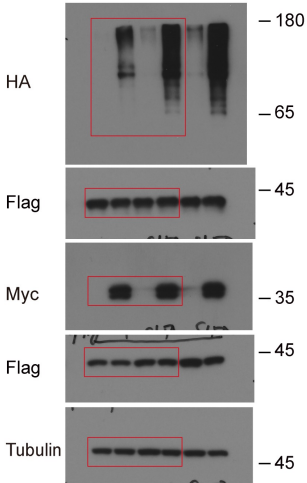

Figure 5I

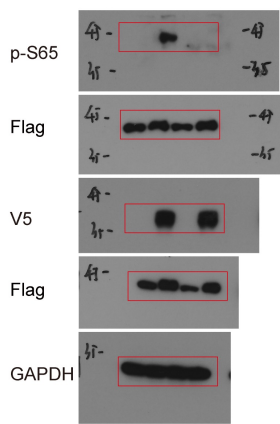

Figure 5J

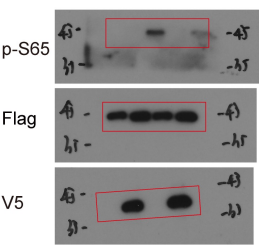

Figure 5K

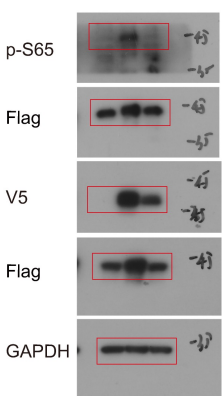

Figure 5L

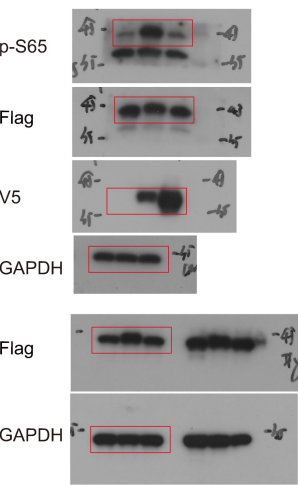

Figure 5P

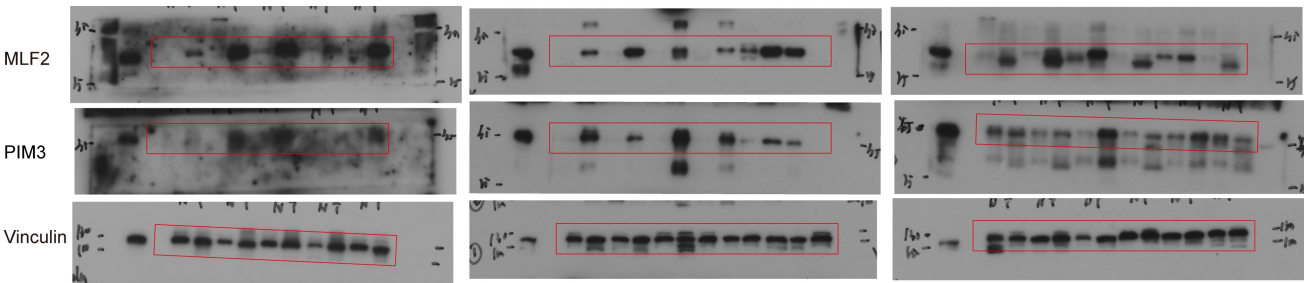

Full unedited blot for Figure6

Figure 6A

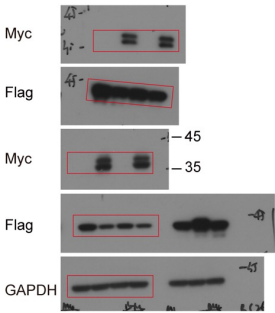

Figure 6B

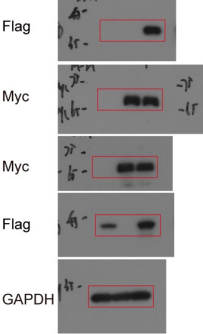

Figure 6C

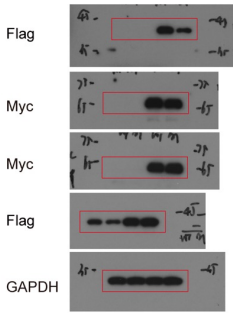

Figure 6D

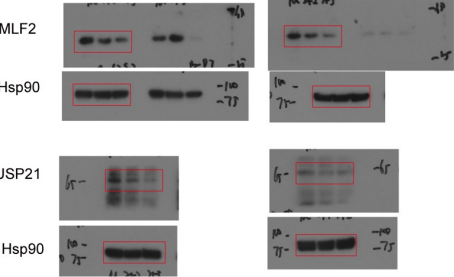

Figure 6E

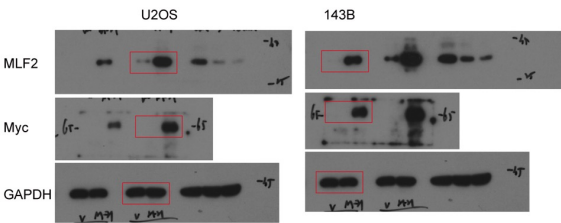

Figure 6F

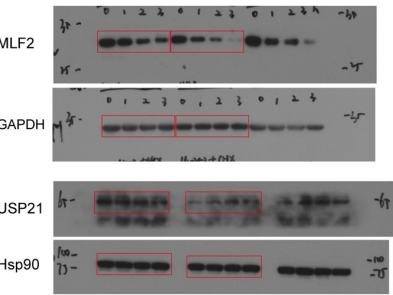

Figure 6H

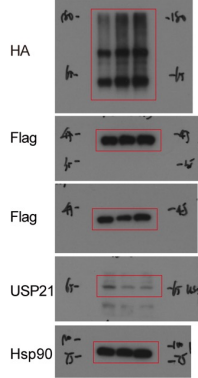

Figure 6K

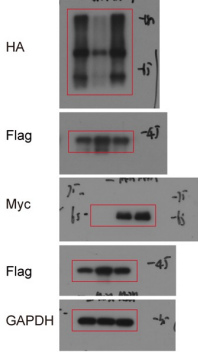

Figure 6I

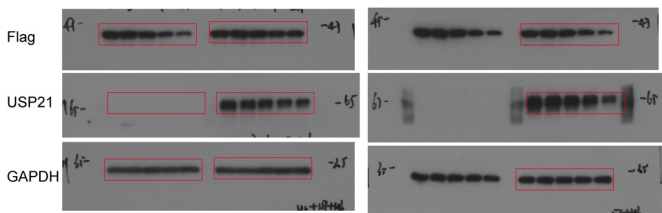

Full unedited blot for FigureS2

Supplementary Figure 2A

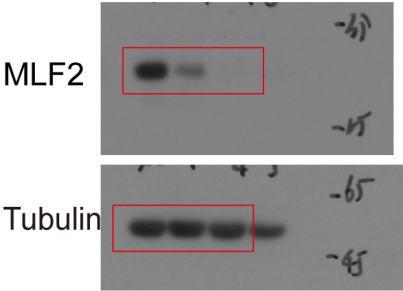

Supplementary Figure 2C

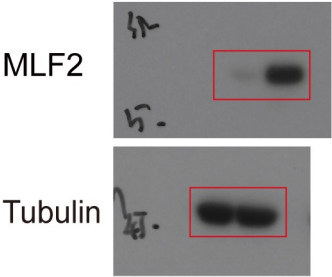

**Full unedited blot for FigureS4**

Supplementary Figure 4A

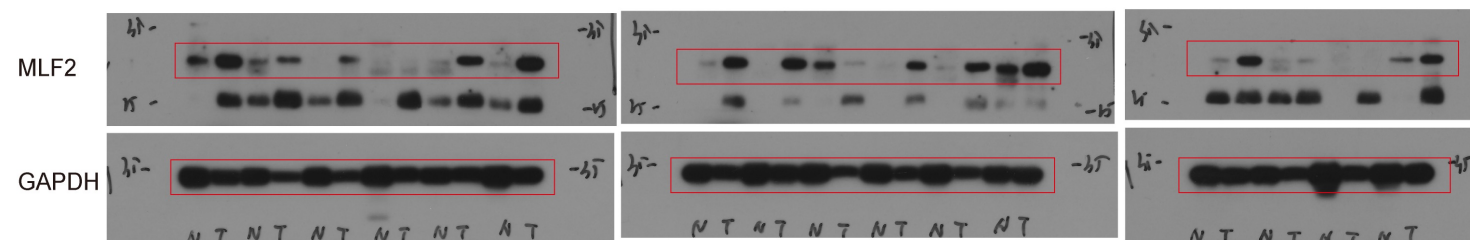

Full unedited blot for FigureS5

Supplementary Figure 5D

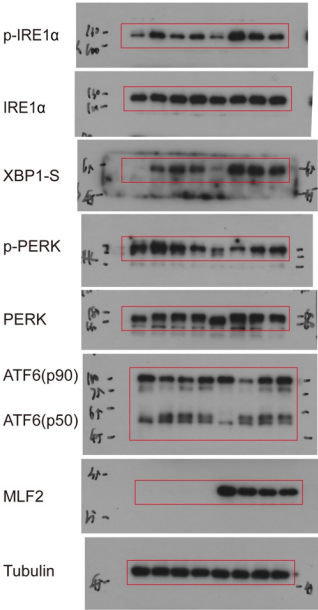

Supplementary Figure 5F

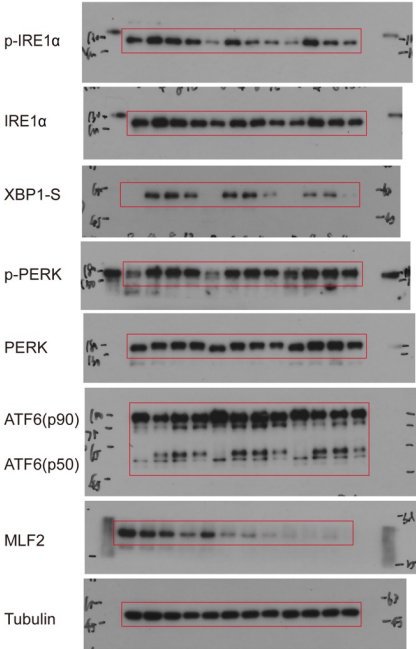

Supplementary Figure 5E

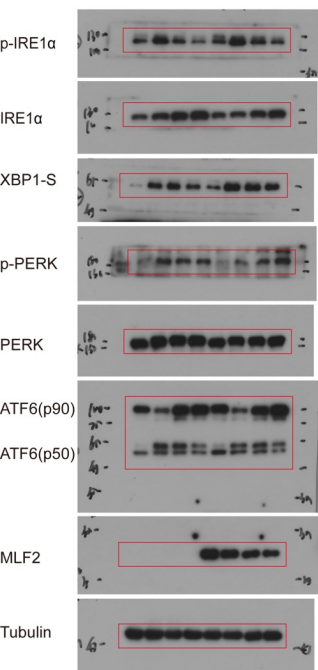

Supplementary Figure 5G

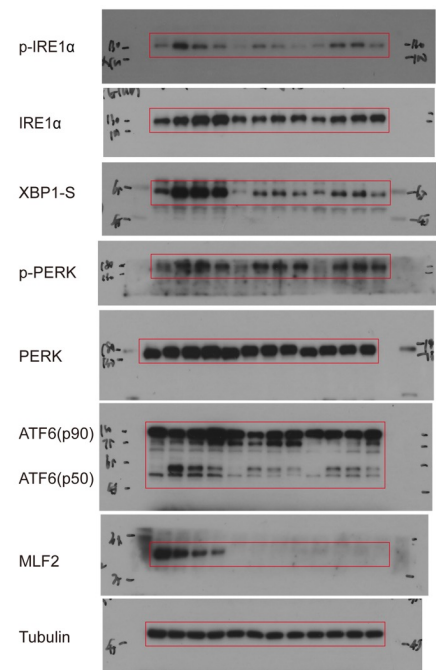

Full unedited blot for FigureS6

Supplementary Figure 6D

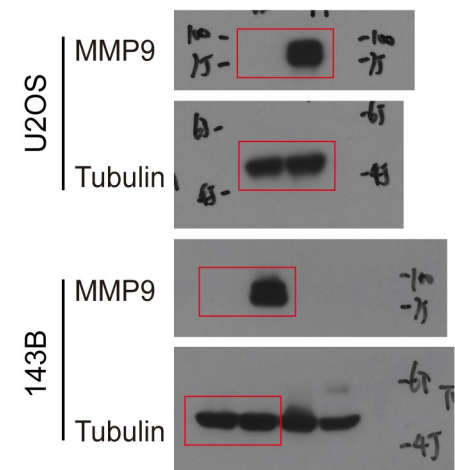

Supplementary Figure 6F

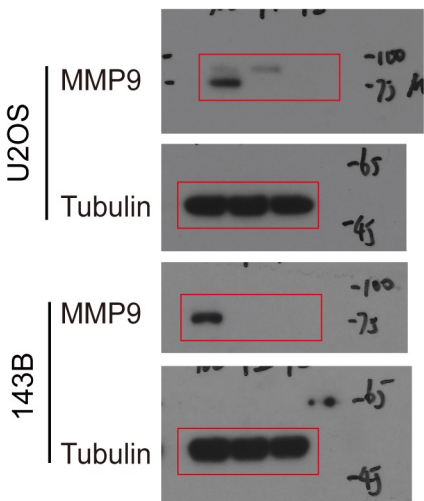

Full unedited blot for FigureS7

Supplementary Figure 7B

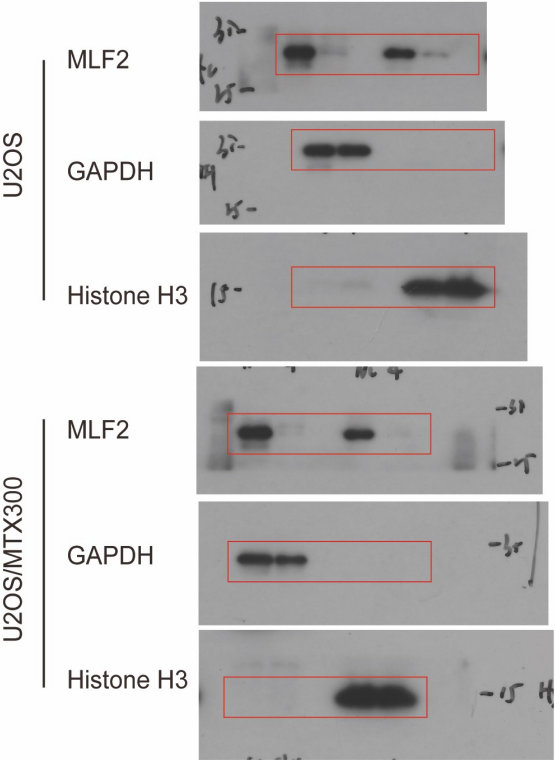

Supplementary Figure 7D

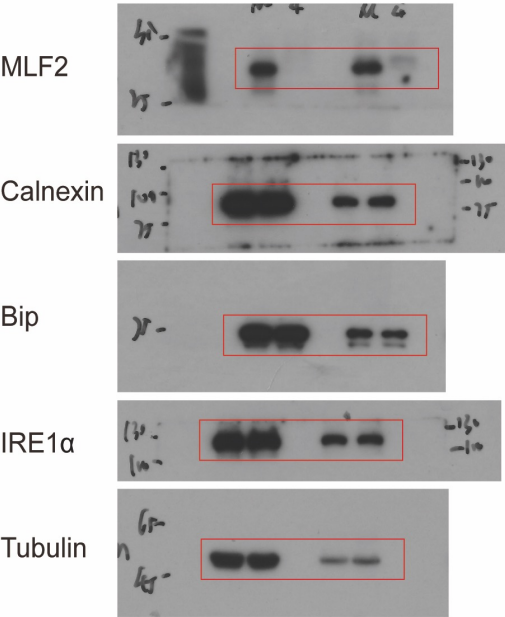



Full unedited blot for FigureS8

Supplementary Figure 8A

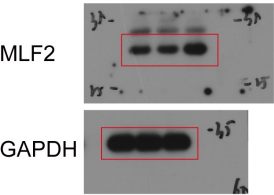

Supplementary Figure 8B

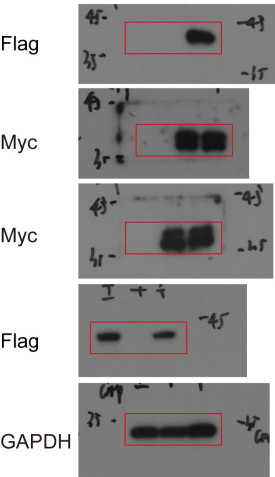

Supplementary Figure 8C

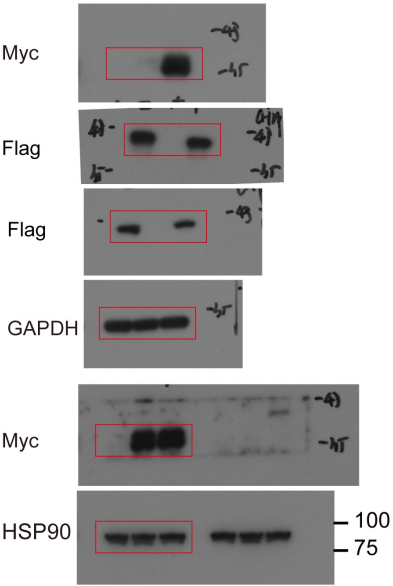

Supplementary Figure 8G

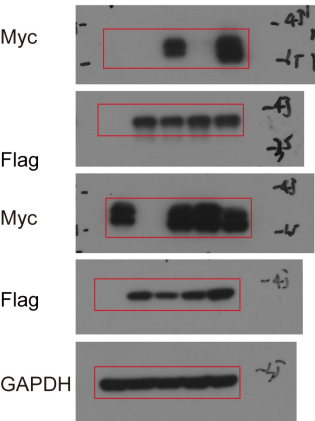

Supplementary Figure 8E

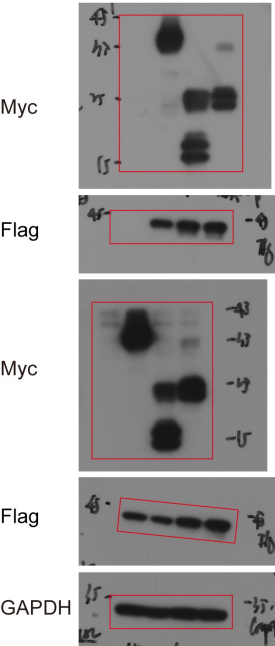

Supplementary Figure 8F

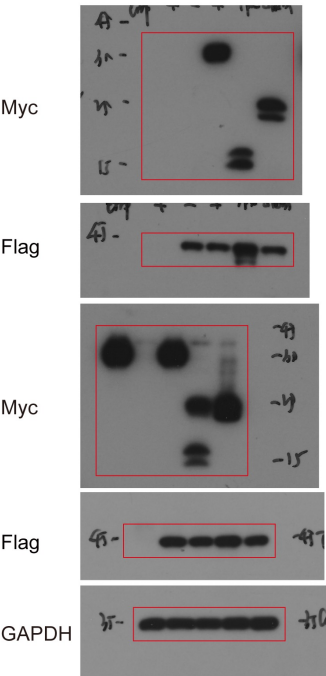

Full unedited blot for FigureS9

Supplementary Figure 9A

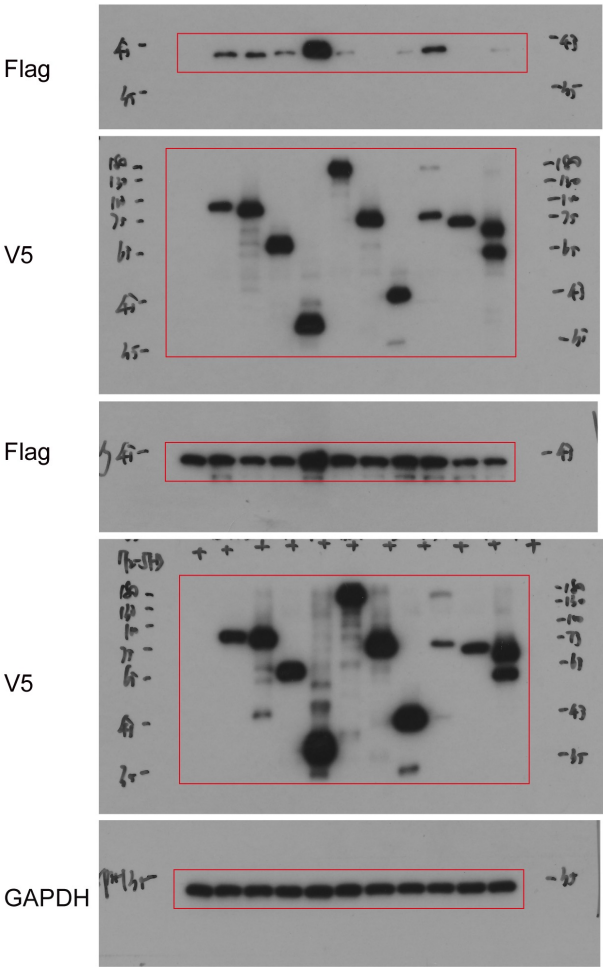

Supplementary Figure 9D

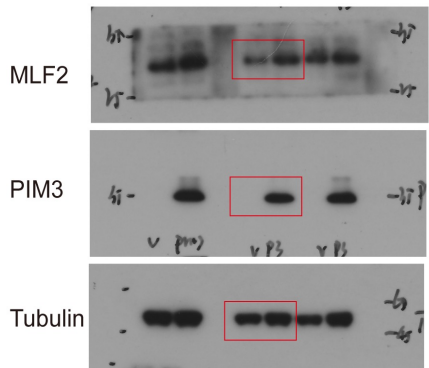

Supplementary Figure 9E

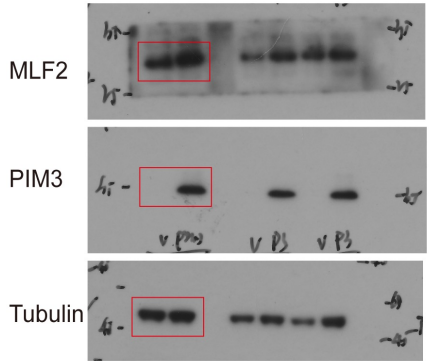

Full unedited blot for FigureS10

Supplementary Figure 10A

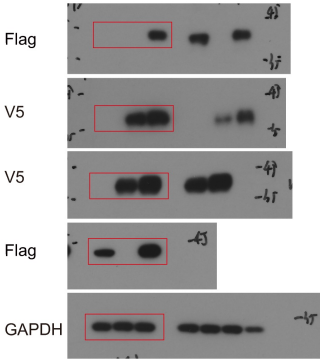

Supplementary Figure 10B

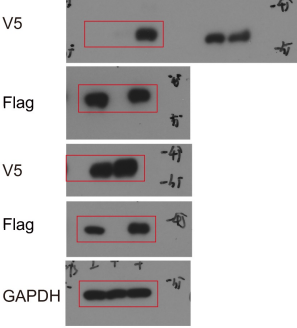

Supplementary Figure 10C

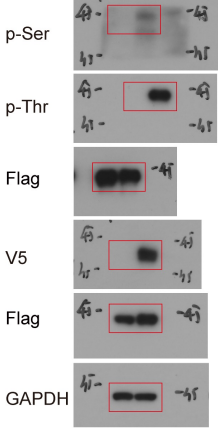

Supplementary Figure 10D

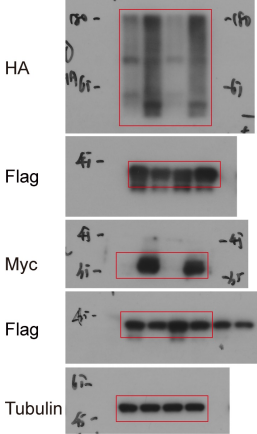

Supplementary Figure 10E

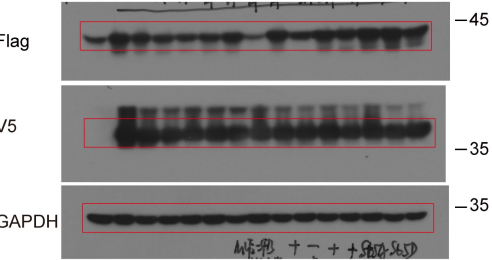

Supplementary Figure 10F

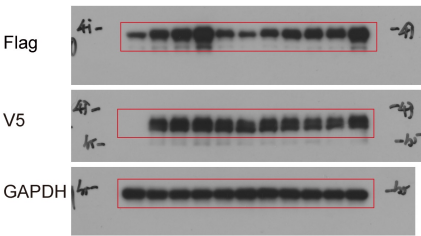

Supplementary Figure 10G

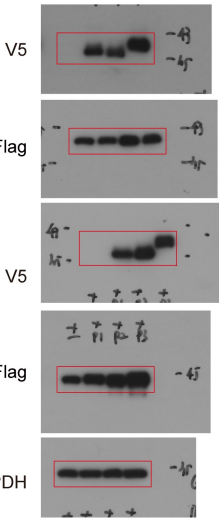

Supplementary Figure 10H

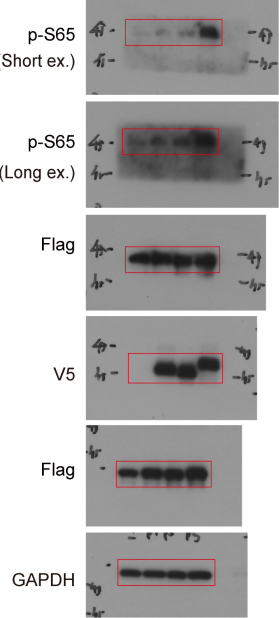

Supplementary Figure 10I

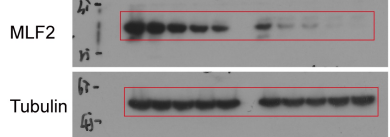

Supplementary Figure 10J

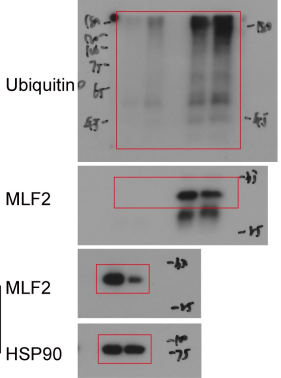

Full unedited blot for FigureS11

Supplementary Figure 11A

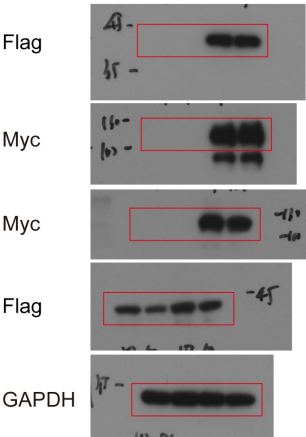

Supplementary Figure 11D

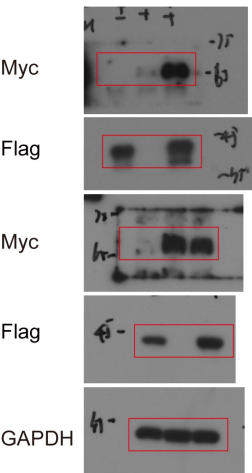

Supplementary Figure 11B

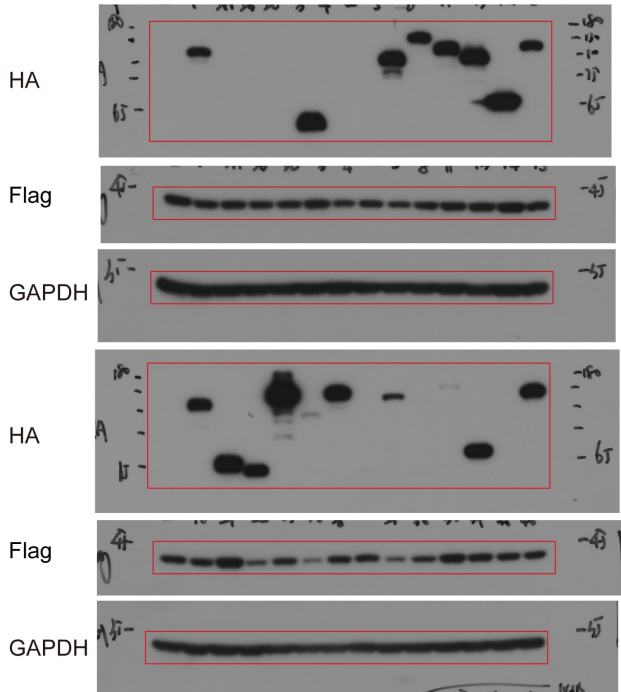

Supplement: sd2 [file 2]
